# Supplementary material for: Activated hepatic stellate cells impair NK cell anti-fibrosis capacity through a TGF-β-dependent emperipolesis in HBV cirrhotic patients
Source: PubMed Central journal article supplement (PMC5349579; doi:10.1038/srep44544), 2017-03-14
Supplement: srep44544-s1.pdf [file srep44544-s1.pdf]

**Activated hepatic stellate cells impair NK cell anti-fibrosis capacity  
through a TGF- $\beta$ -dependent emperipolesis in HBV cirrhotic patients**

Jijing Shi, Juanjuan Zhao, Xin Zhang, Yongqian Cheng, Jinhua Hu, Yuanyuan Li, Xin  
Zhao, Qinghua Shang, Yanling Sun, Bo Tu, Lei Shi, Bin Gao, Fu-Sheng Wang, Zheng  
Zhang

## Supplemental information

**Supplemental Table 1. Clinical characteristics of enrolled subjects**

| Category                          | healthy control | chronic hepatitis                              | liver cirrhosis                                |
|-----------------------------------|-----------------|------------------------------------------------|------------------------------------------------|
|                                   | (HC)            | B (CHB)                                        | (LC)                                           |
| Cases                             | 38              | 36                                             | 43                                             |
| Age (years)                       | 29 (21–48)      | 31 (19–52)                                     | 48 (25–68)                                     |
| Gender (M/F)                      | 28/10           | 28/8                                           | 37/16                                          |
| Alanine aminotransferase (IU/L)   | ND              | 72 (6–627)                                     | 35 (8–218)                                     |
| Aspartate Aminotransferase (IU/L) | ND              | 43 (14–481)                                    | 47 (15–278)                                    |
| Serum albumin (g/L)               | ND              | 39 (32–50)                                     | 33 (23–44)                                     |
| Total bilirubin (μmol/L)          | ND              | 14.4 (0.82–414)                                | 26.7 (7.1–181)                                 |
| Direct bilirubin (μmol/L)         | ND              | 5.4 (1.6–236)                                  | 12.9 (4.0–301)                                 |
| Prothrombin activity (%)          | ND              | 92 (68–190)                                    | 66.4 (22–101)                                  |
| HBeAg positive/negative           | ND              | 18/18                                          | 30/23                                          |
| Serum HBV levels (IU/ml)          | ND              | $3.5 \times 10^7$<br>(100– $4.6 \times 10^9$ ) | $2.8 \times 10^5$<br>(100– $1.1 \times 10^8$ ) |

Data are shown as median and range. ND, no data.

## **Supplemental Figure Legends**

### **Supplemental Figure 1. Plasma TGF- $\beta$ levels in HC subjects and CHB and LC patients.**

Each dot represents one individual. The horizontal lines indicate the mean values. *P*-values shown in the figures are based on two-tailed, unpaired Student's *t*-test.

### **Supplemental Figure 2. TGF- $\beta$ does not influence the activation of NK cells.**

Representative dot plots depict CD38 and HLA-DR expression on peripheral NK cells from six HC subjects under various culture conditions. CD3<sup>-</sup>CD56<sup>+</sup> NK cells were gated. Values in the quadrants represent the percentages of CD3<sup>-</sup>CD56<sup>+</sup> NK cells that express CD38 and HLA-DR.

### **Supplemental Figure 3. Blockade of TGF- $\beta$ failed to enhance the production of CD107a and IFN- $\gamma$ by NK cells co-cultured with plasma from HC and CHB patients.**

Each dot represents one individual.

**Supplemental Figure 4. Immunofluorescence staining indicated that NK cells were internalized by HSCs and displayed an apoptotic status in HSCs.** NK cells from LC patients (*n* = 4) were pre-stained with CellTracker Orange CMTMR and then co-cultured with LX2 cells, before being subjected to TUNEL staining. CellTracker Orange CMTMR showed the NK/HSC cytoplasm. DAPI stained the cell nuclei;  $\times$  630 magnification.

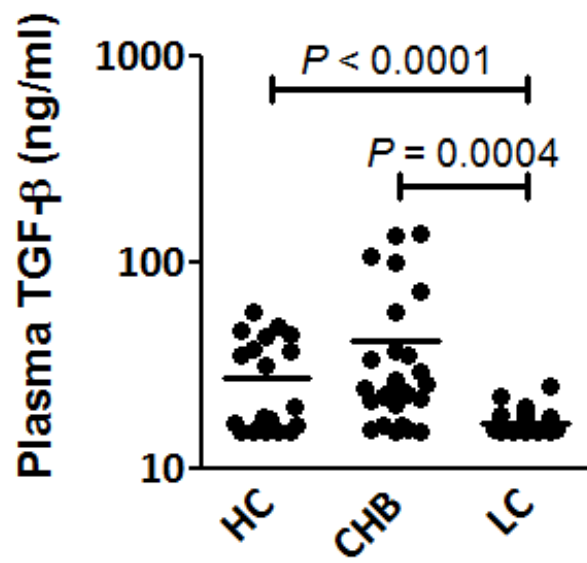

Supplemental Figure-1 (Zhang)

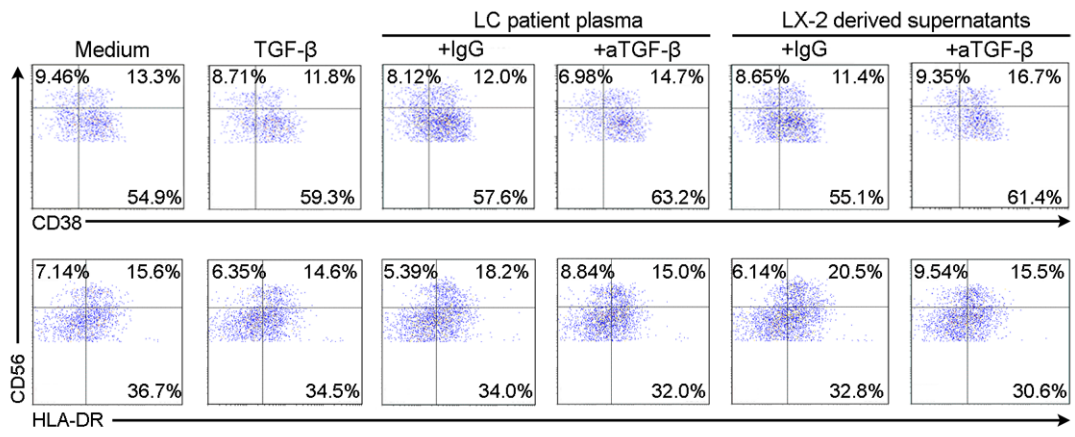

**Supplemental Figure-2 (Zhang)**

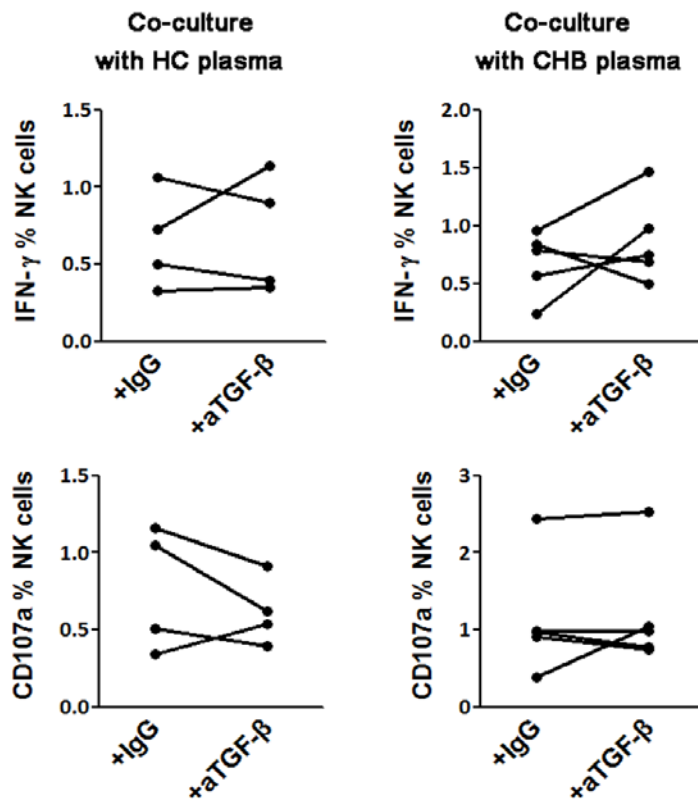

Supplemental Figure-3 (Zhang)

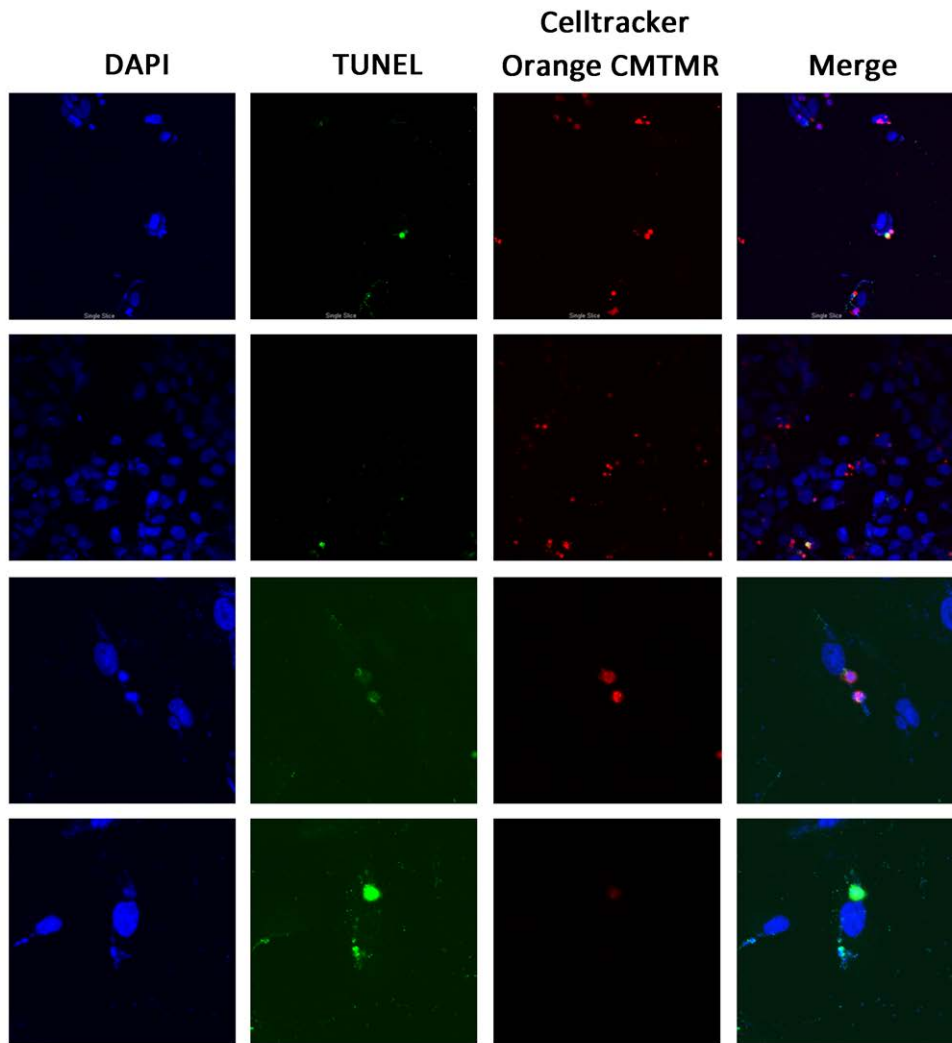

Supplemental Figure-4 (Zhang)
